# Supplementary material for: The impact of surgery and oncological treatment on risk of type 2 diabetes onset in patients with colorectal cancer: nationwide cohort study in Denmark
Source: eLife journal article supplement (doi:10.7554/elife.89354), 2023-11-07
Supplement: supp1 [file elife-89354-supp1-v1.pdf]

**Supplementary table 1. Risk of developing T2D after different types of colorectal cancer surgery with and without chemotherapy – adjusted for cancer stage, Model 1 and Model 2**

|                                 | Adjusted for UICC |                | Model 1 + UICC   |                | Model 2+UICC     |                |
|---------------------------------|-------------------|----------------|------------------|----------------|------------------|----------------|
|                                 | HR (95%CI)        | <i>p-value</i> | HR (95%CI)       | <i>p-value</i> | HR (95%CI)       | <i>p-value</i> |
| <b>Surgery and chemotherapy</b> |                   |                |                  |                |                  |                |
| Right-No-Chemo                  | ref               |                |                  |                |                  |                |
| Right-Chemo                     | 0.98 (0.83;1.15)  | 0.788          | 0.93 (0.78;1.11) | 0.441          | 0.97 (0.81;1.16) | 0.731          |
| Left-No-Chemo                   | 1.11 (0.98;1.24)  | 0.097          | 0.93 (0.81;1.06) | 0.269          | 0.94 (0.83;1.07) | 0.374          |
| Left-Chemo                      | 1.03 (0.89;1.19)  | 0.730          | 0.88 (0.74;1.03) | 0.120          | 0.93 (0.79;1.09) | 0.373          |
| Rectal-No-Chemo                 | 0.93 (0.82;1.05)  | 0.225          | 0.81 (0.71;0.93) | 0.002          | 0.85 (0.74;0.97) | 0.018          |
| Rectal-Chemo                    | 0.89 (0.76;1.04)  | 0.139          | 0.76 (0.64;0.90) | 0.002          | 0.82 (0.69;0.97) | 0.022          |

Right: Right-sided colonic resections; Left: Left-sided colonic resections; Rectal: Rectal resections

No-Chemo: No chemotherapy; Chemo: Chemotherapy

All Colon: All right- and left-sided colonic resections with and without chemotherapy

All Rectal: All rectal resections with and without chemotherapy, and with and without radiation therapy

Model 1: adjusted for year of surgery, age at surgery, sex, BMI

Model 2: adjusted like Model 1 and further adjusted for performance status before surgery assessed by American Society of Anesthesiologist physical scale, smoking and alcohol
